# Supplementary material
Source: bioRxiv or medRxiv preprint supplement (https://www.biorxiv.org/highwire/filestream/119684/field_highwire_adjunct_files/0/395004-1.pdf)

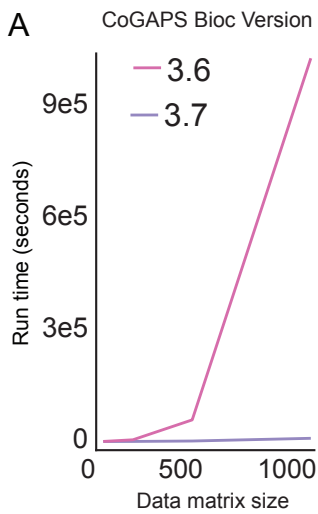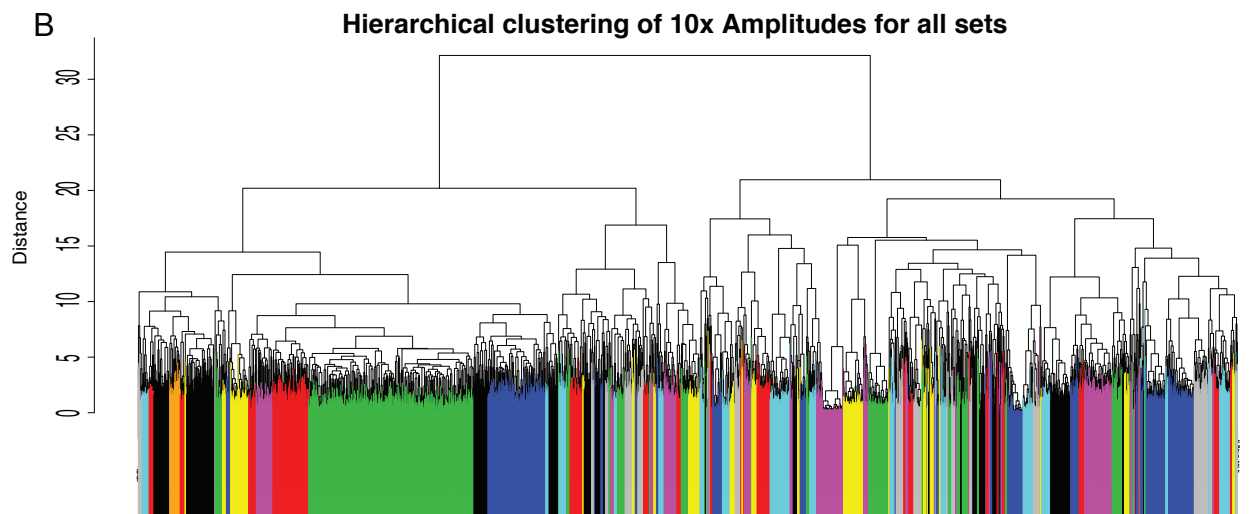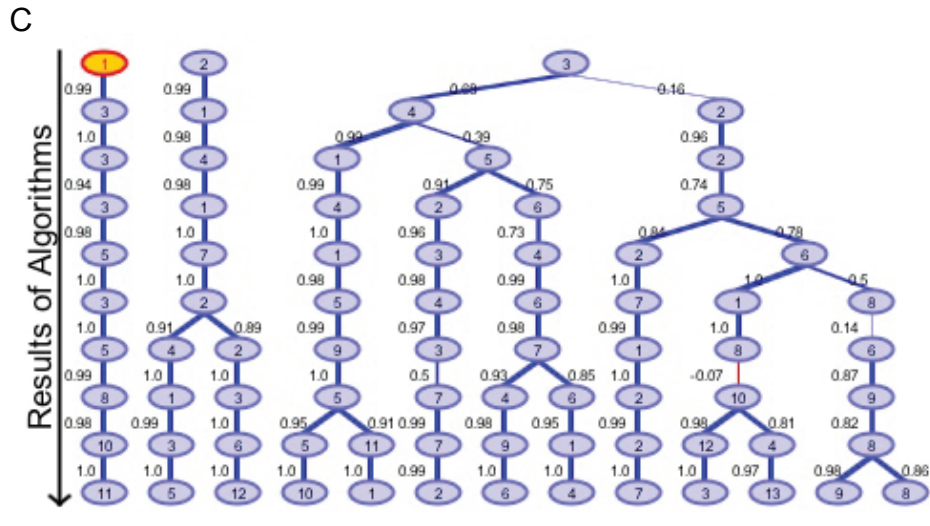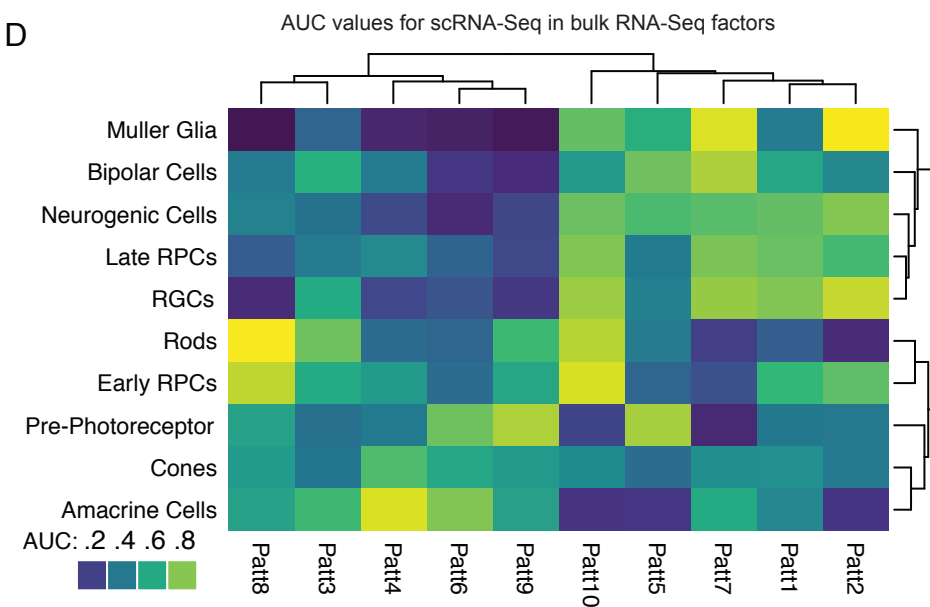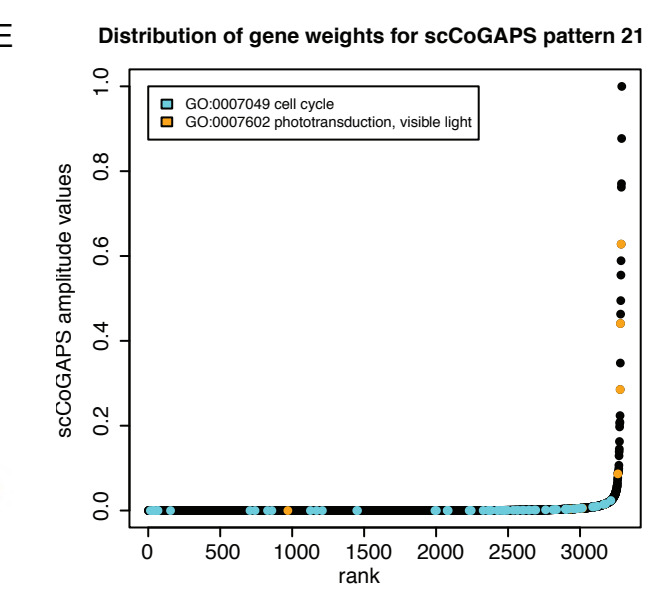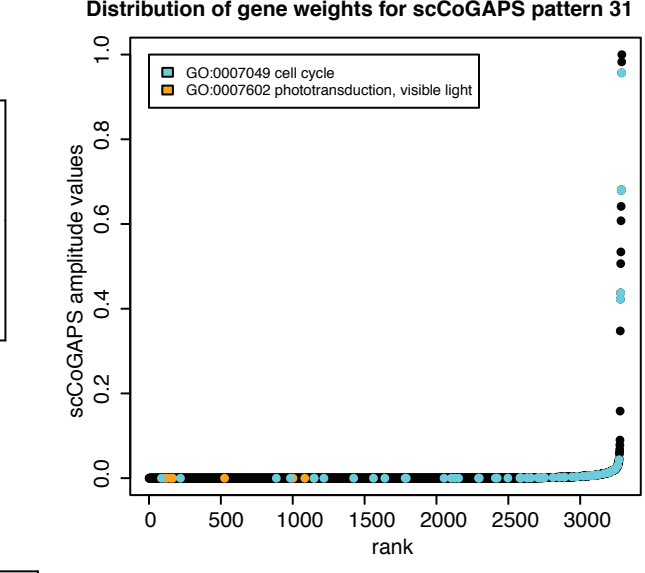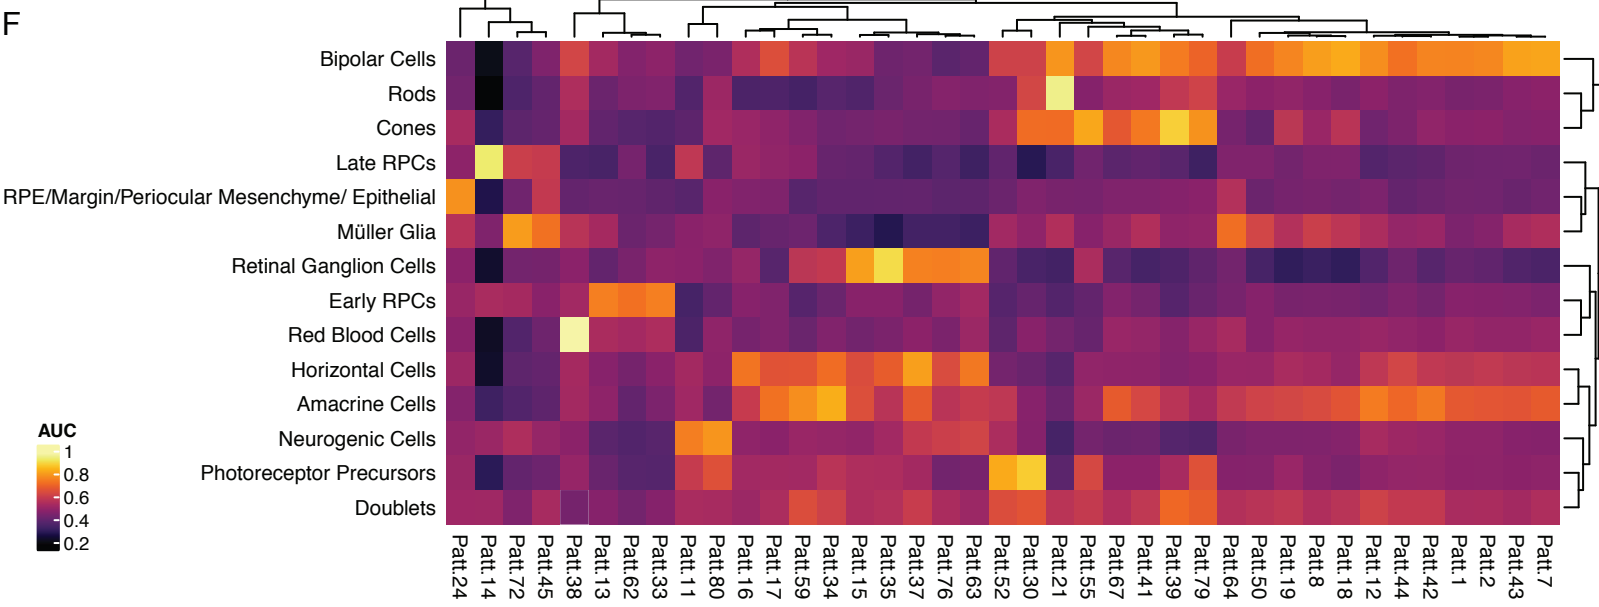

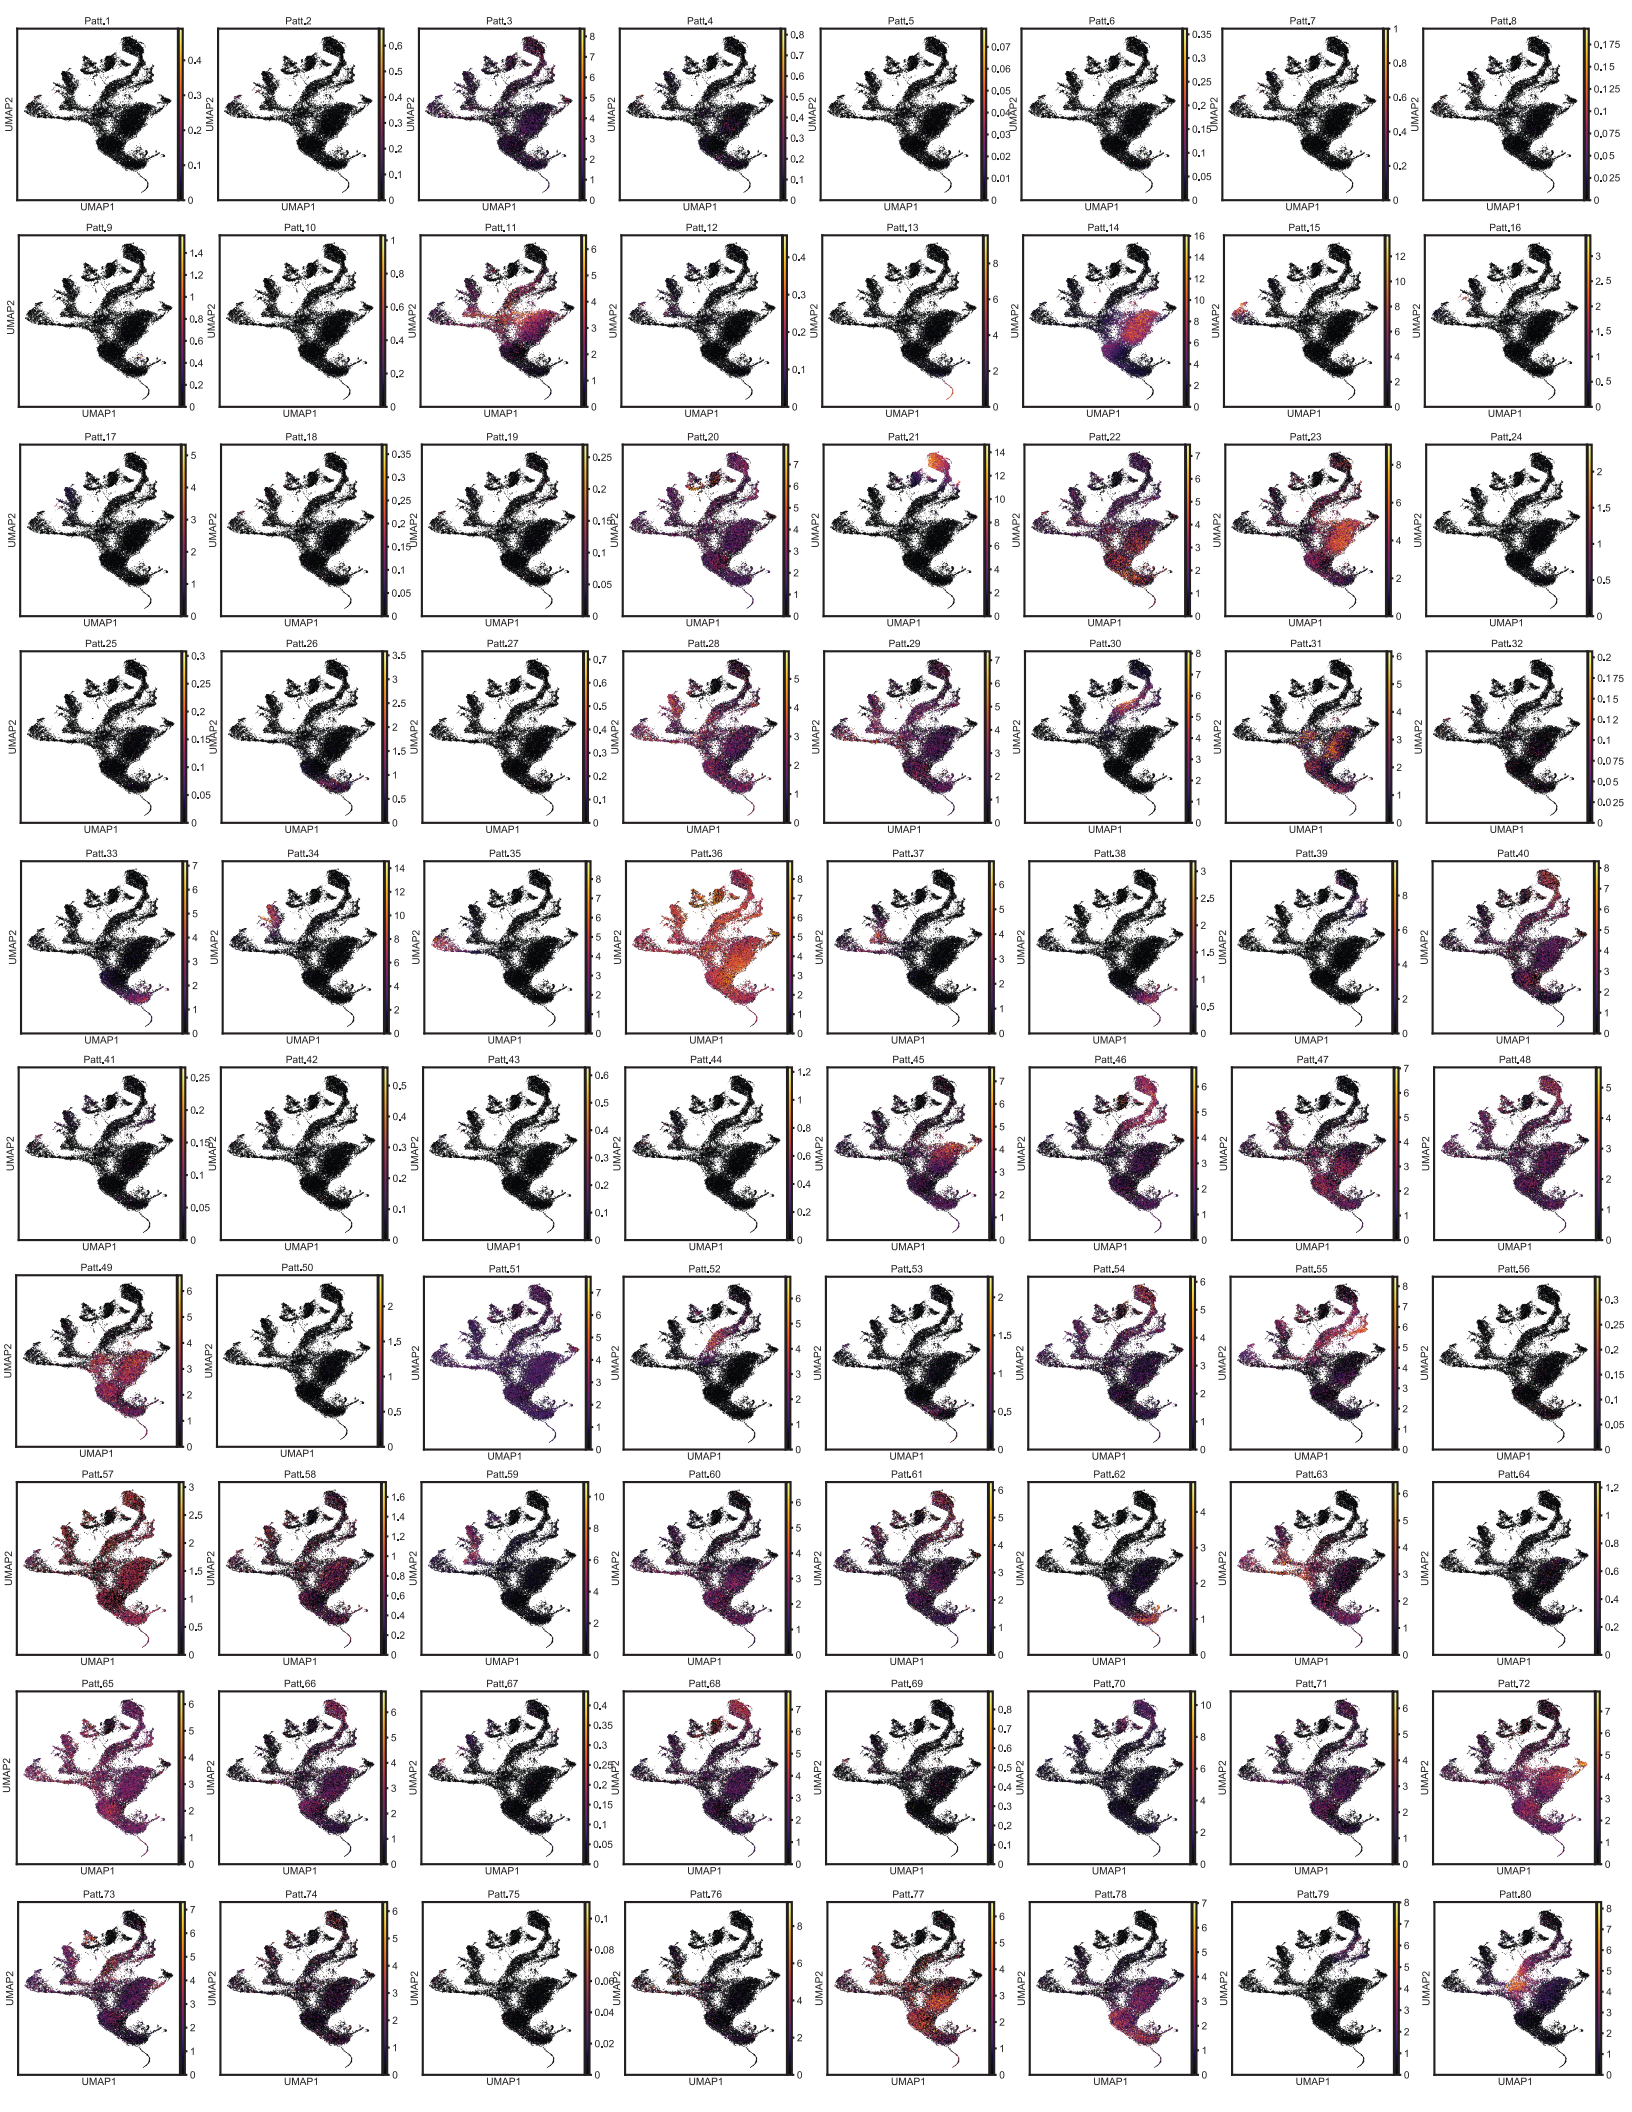

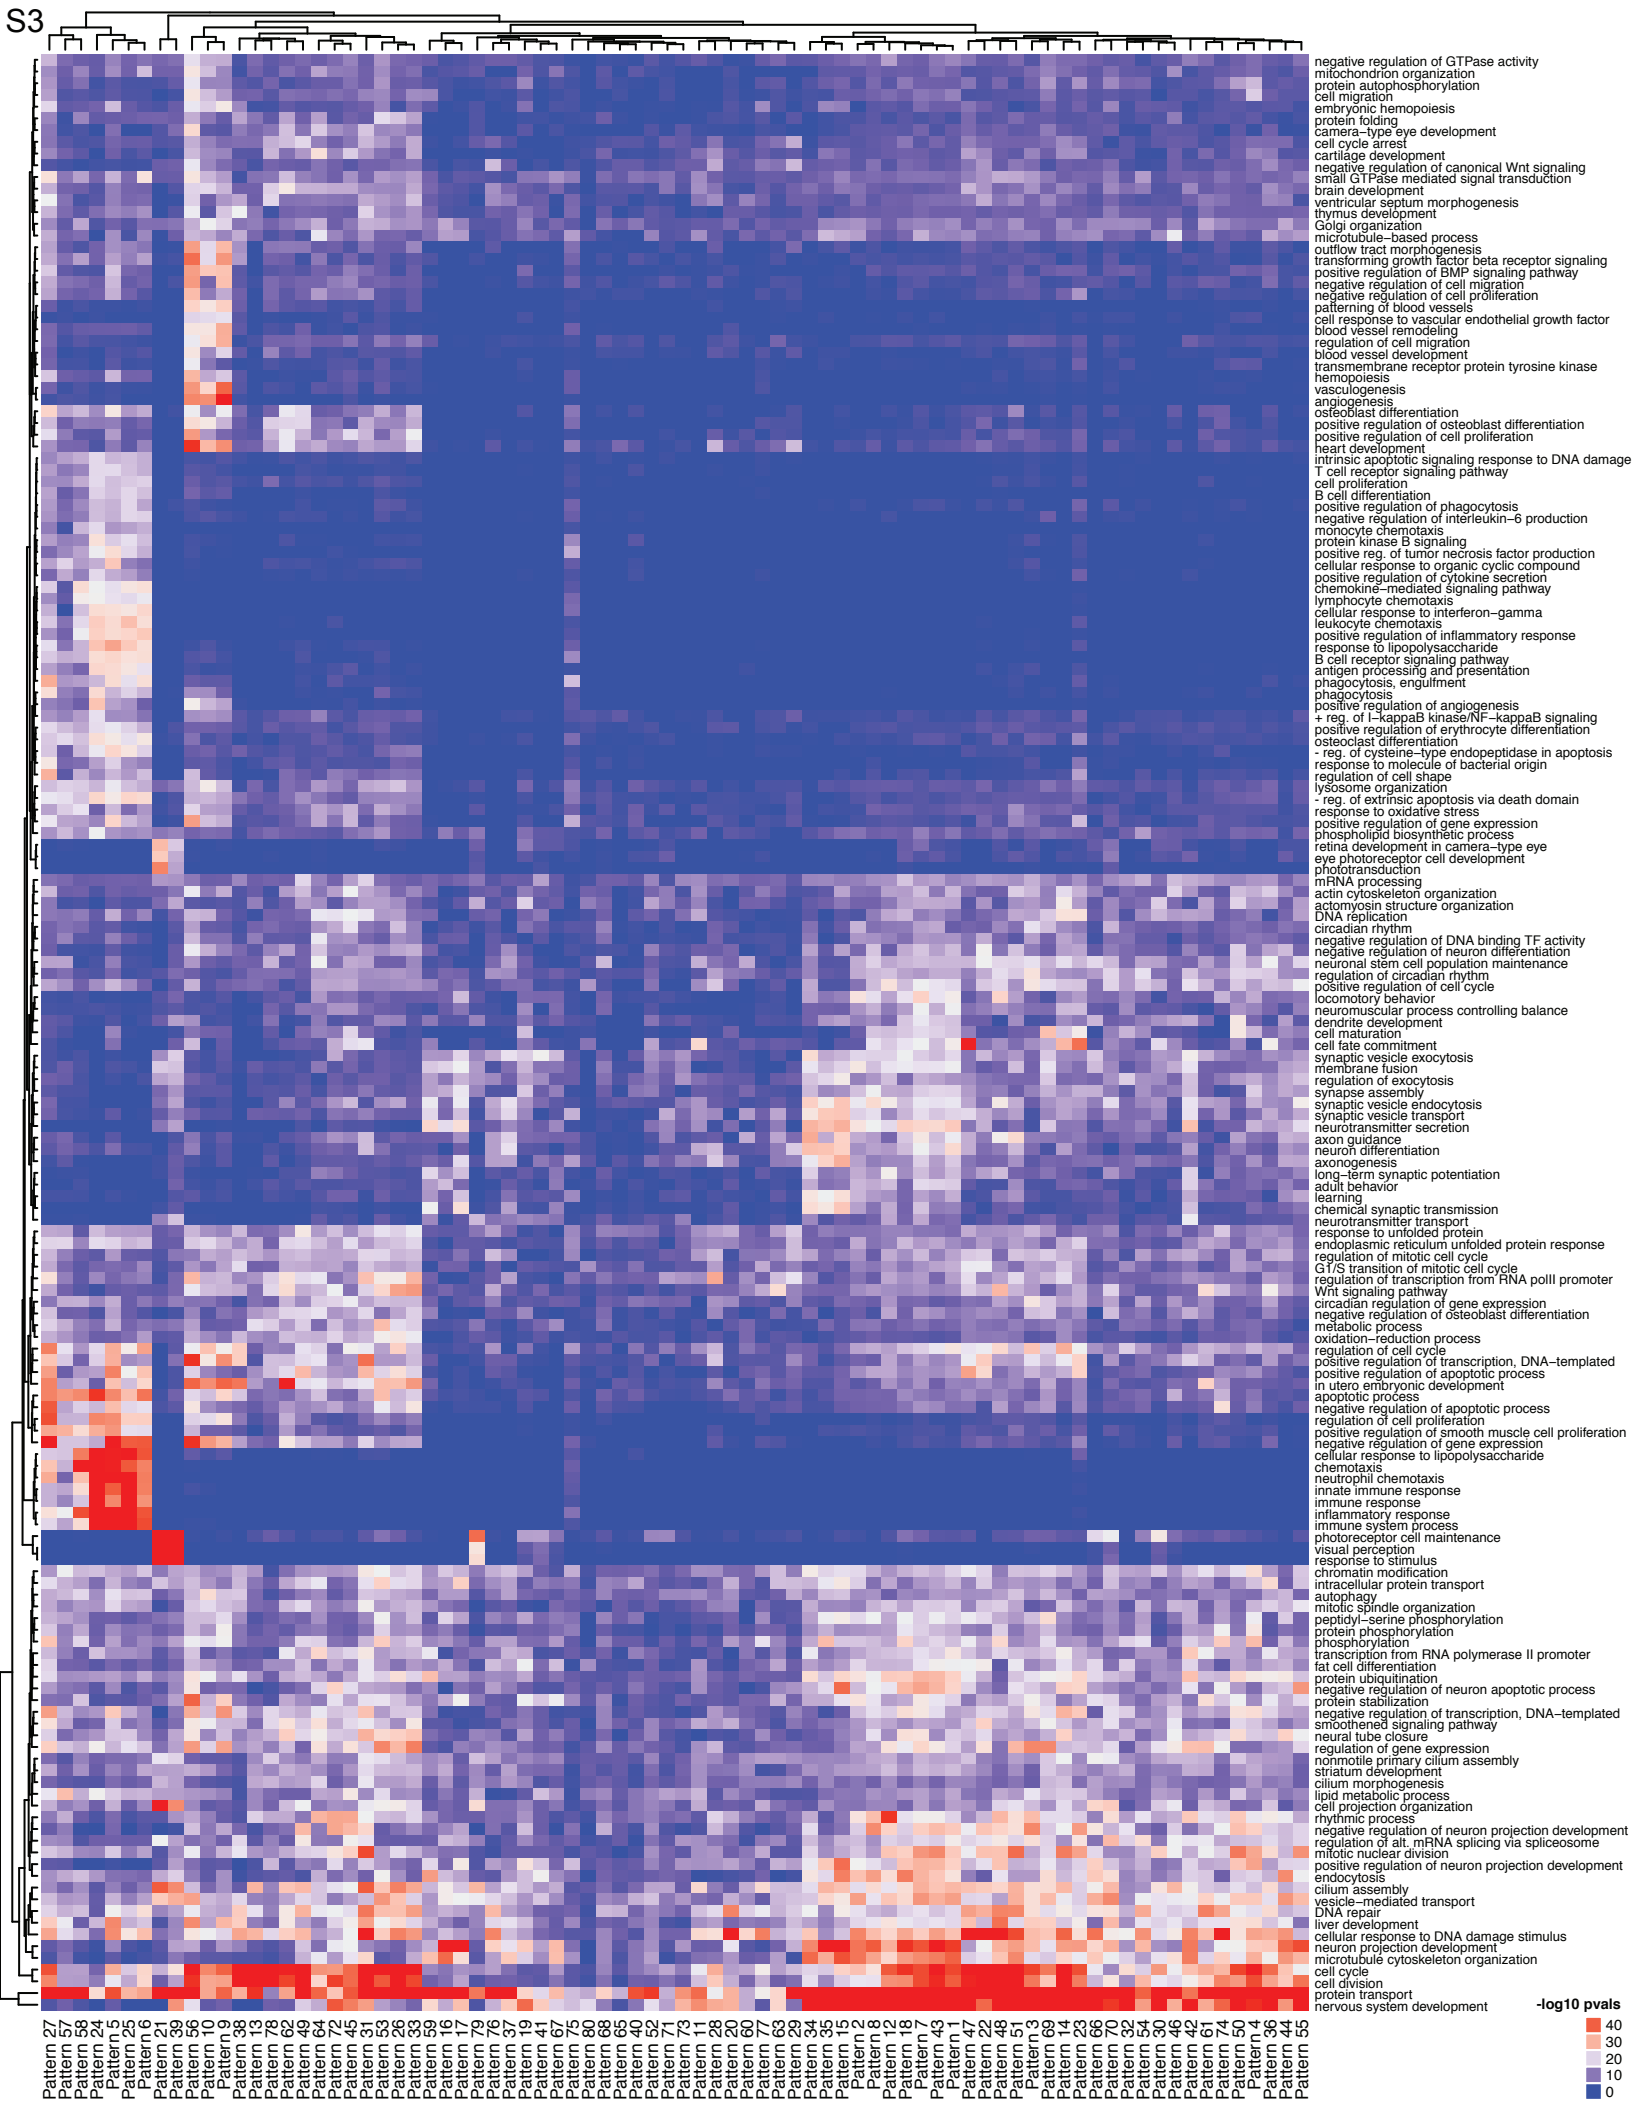

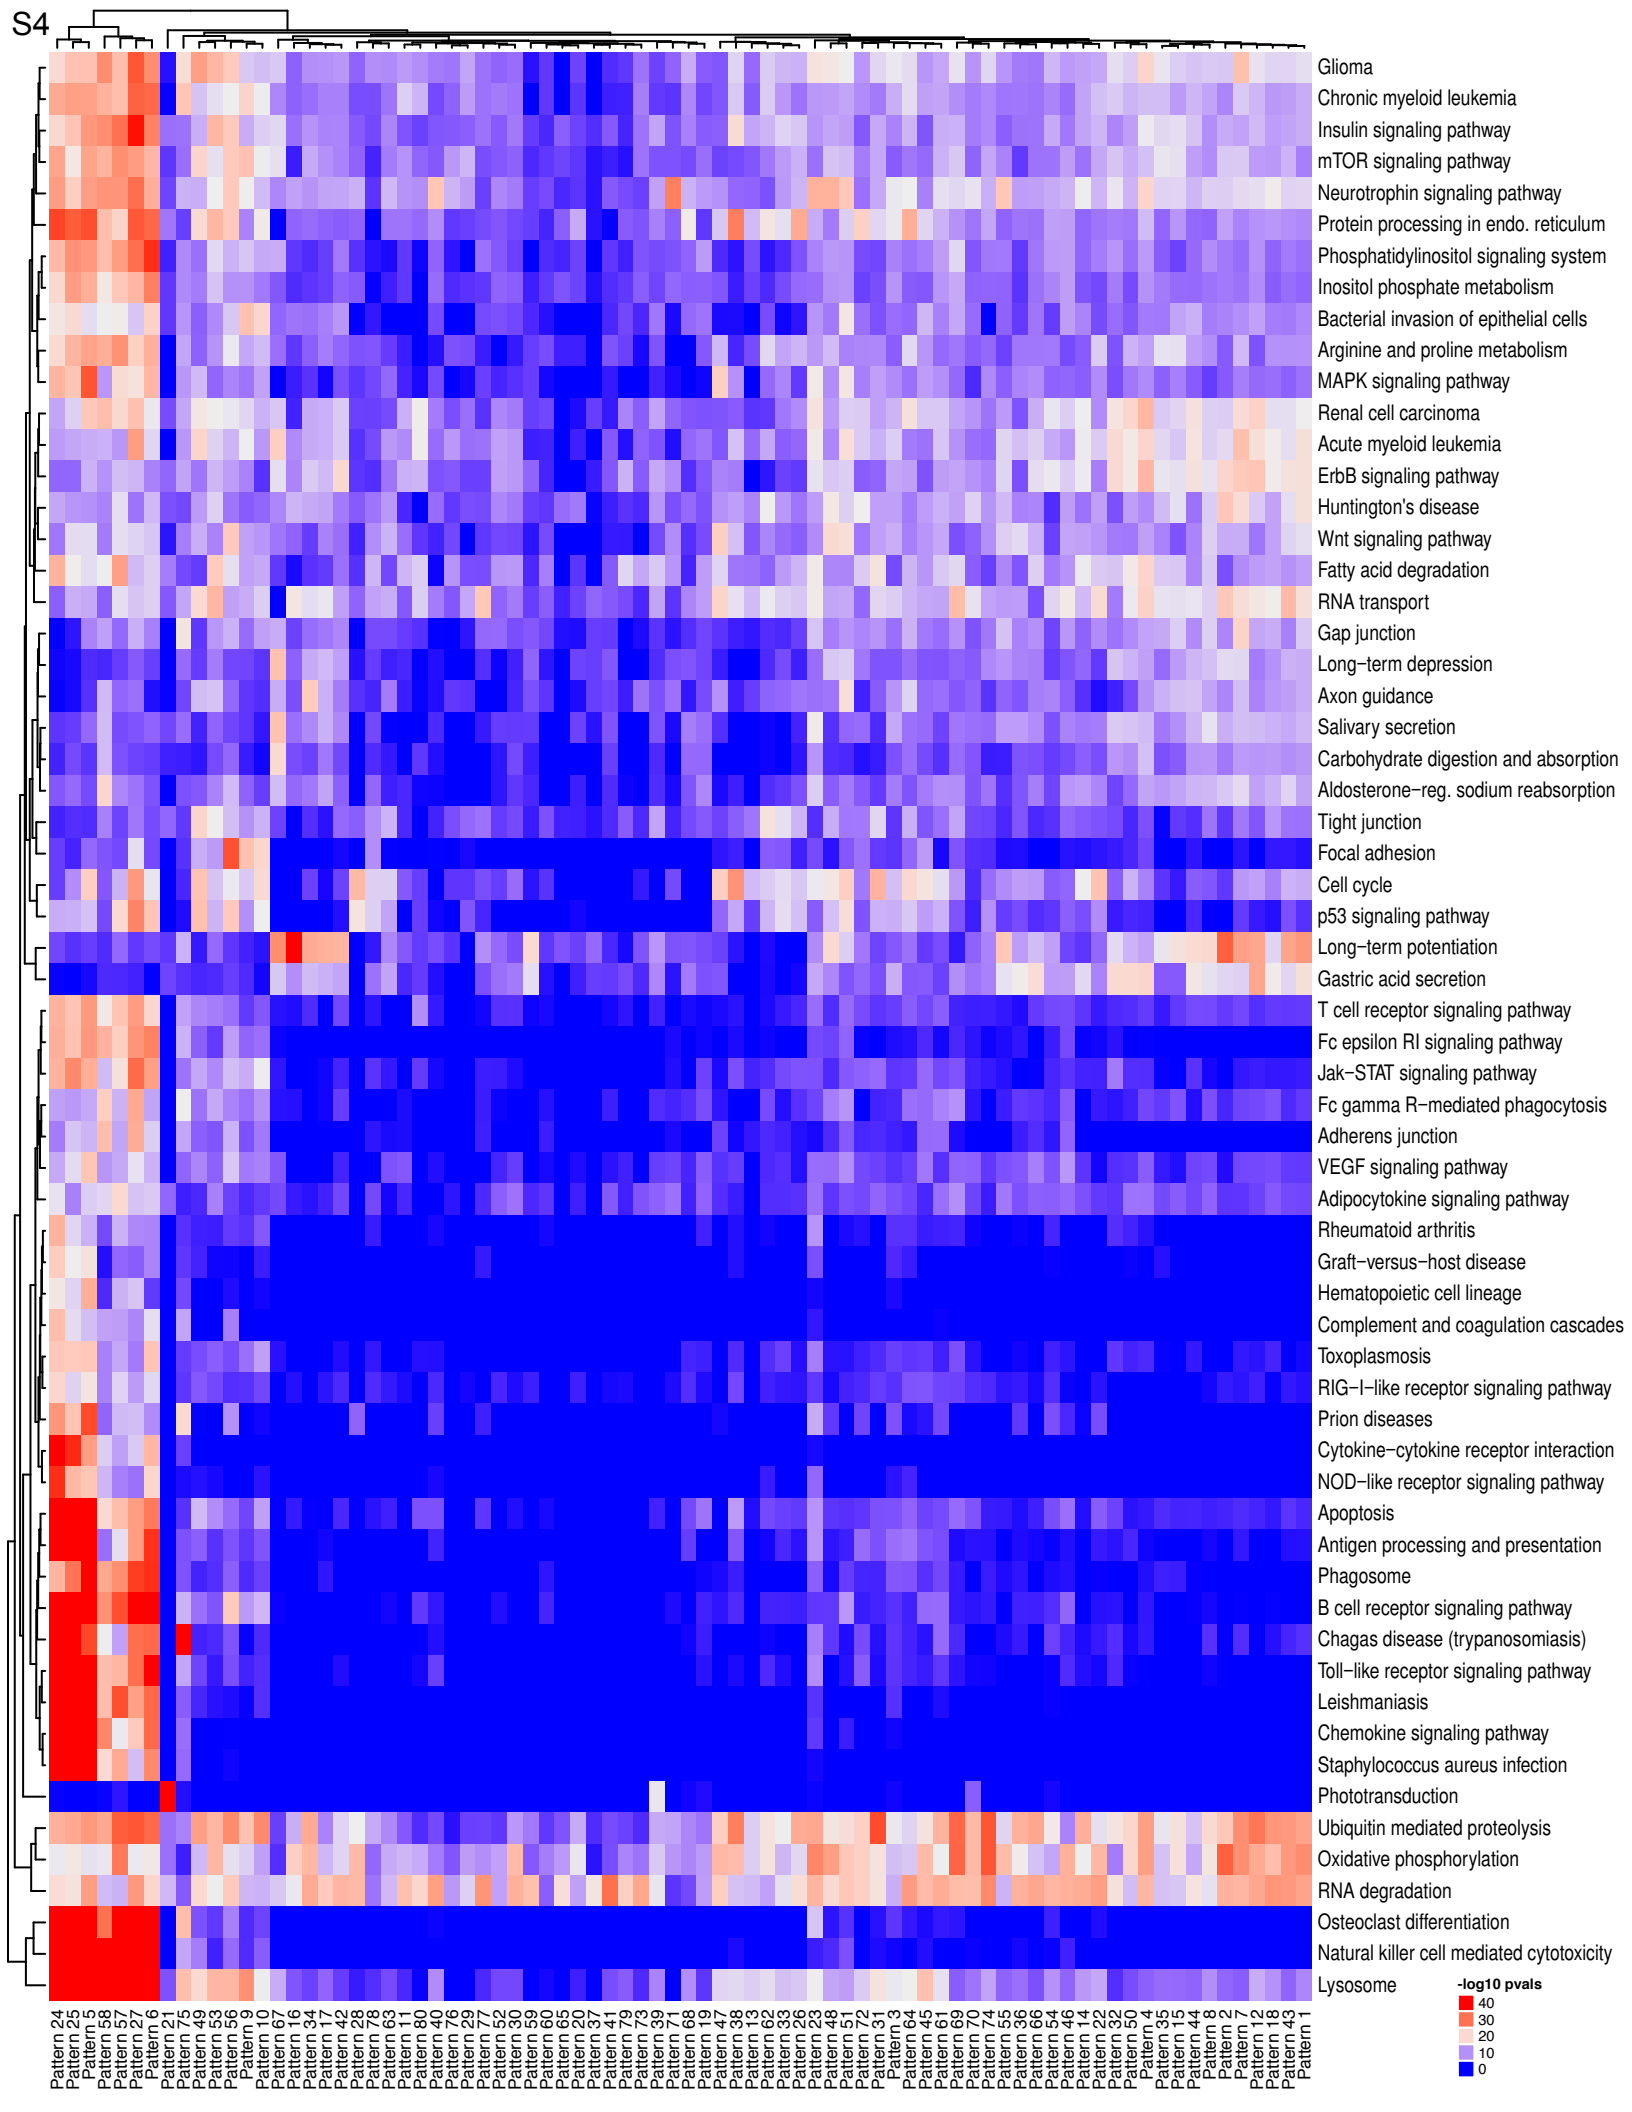

**A** AUC values for projected murine scRNAseq of P14 mouse retina from Macosko et al.

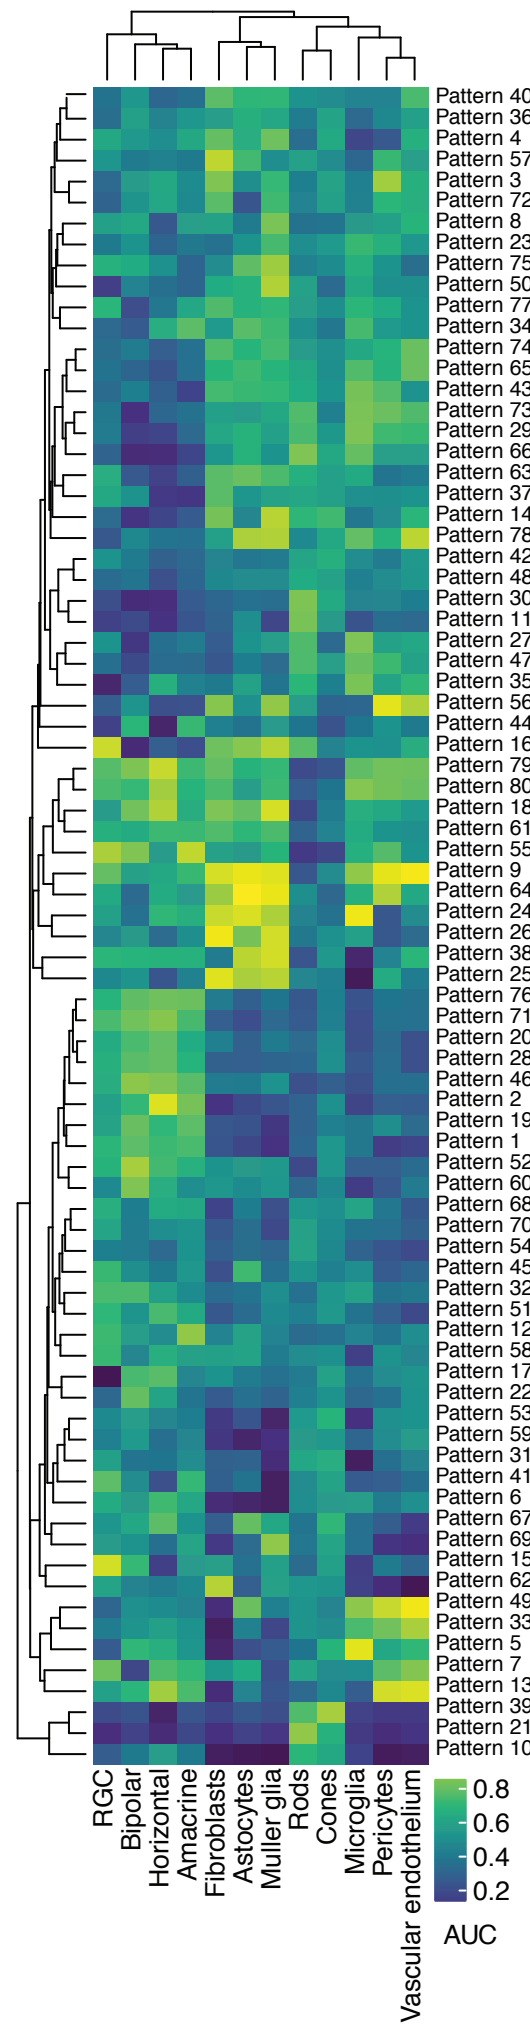

**B** AUC values for projected human bulk RNAseq of the developing retina from Hoshino et al.

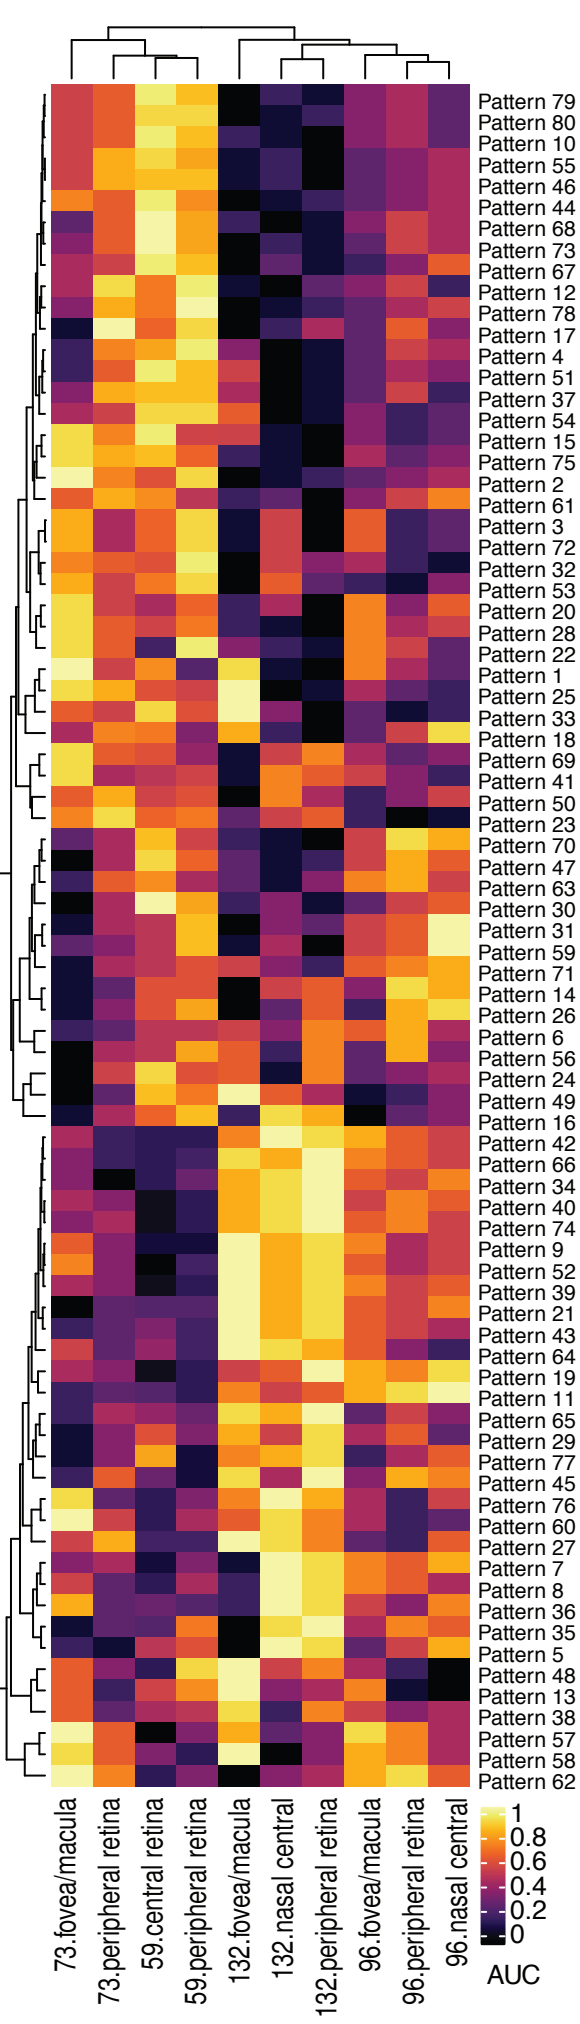

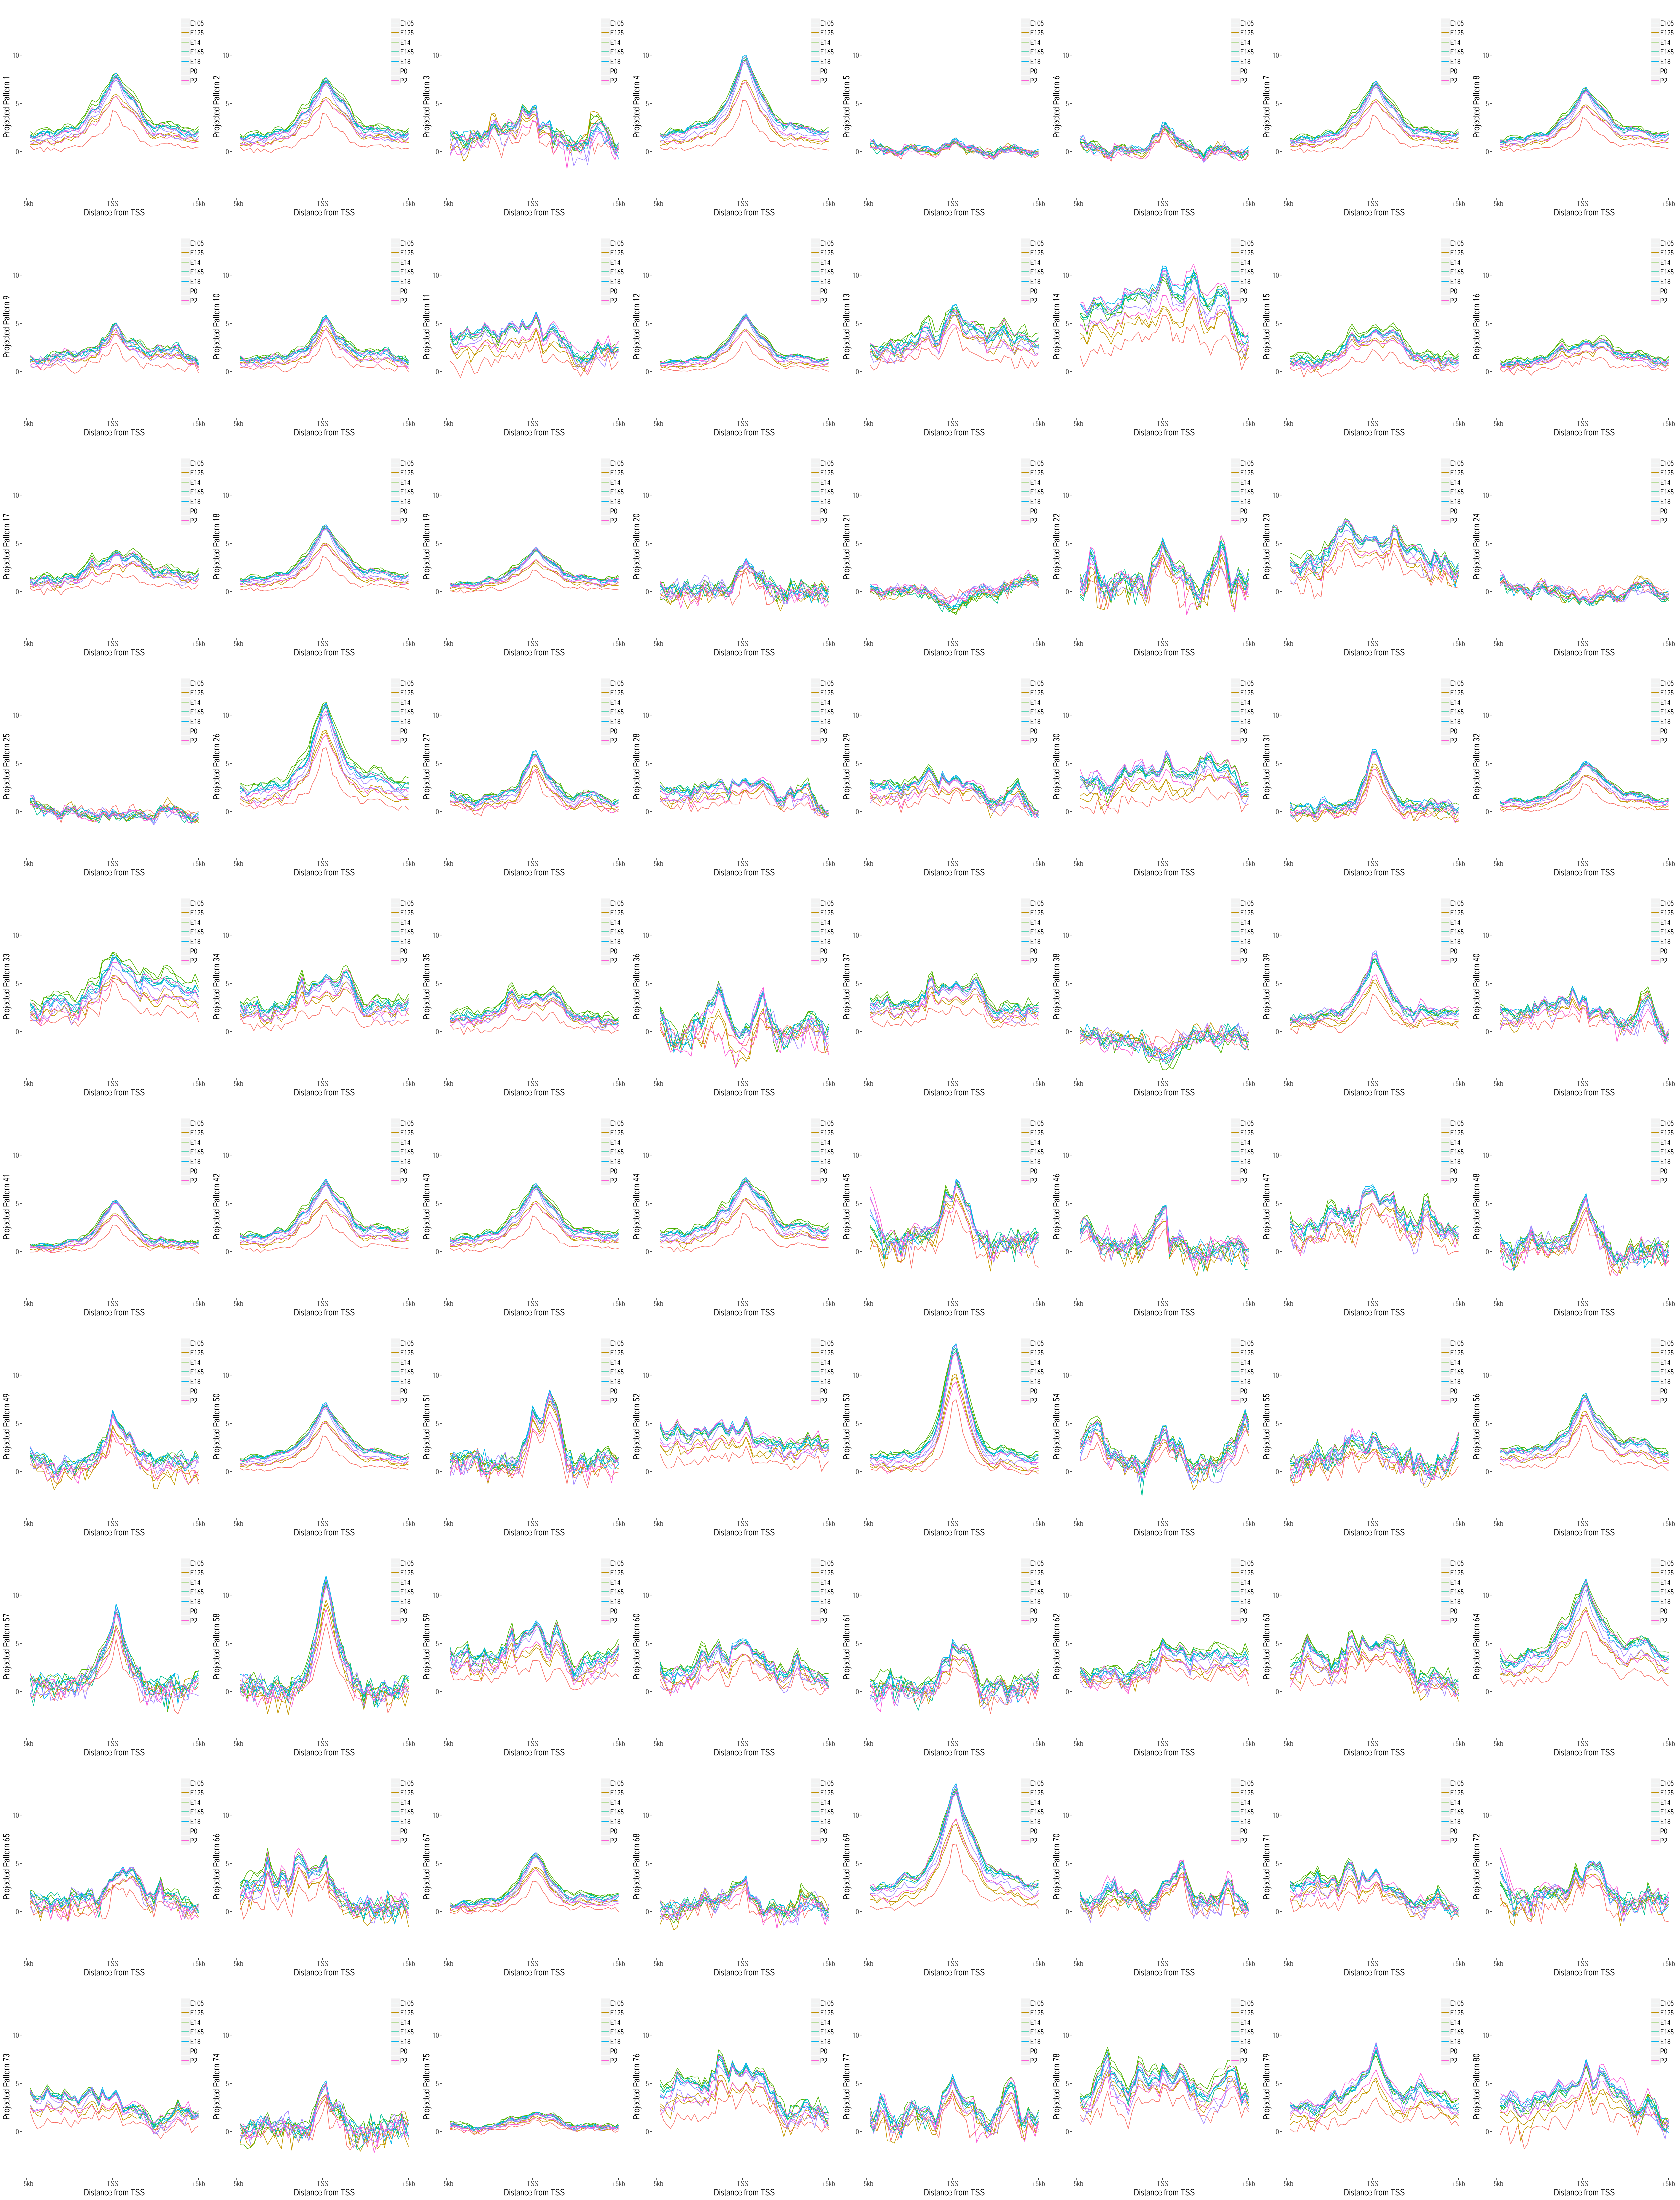

**A** Pattern explains at least 75% of cells in a given type

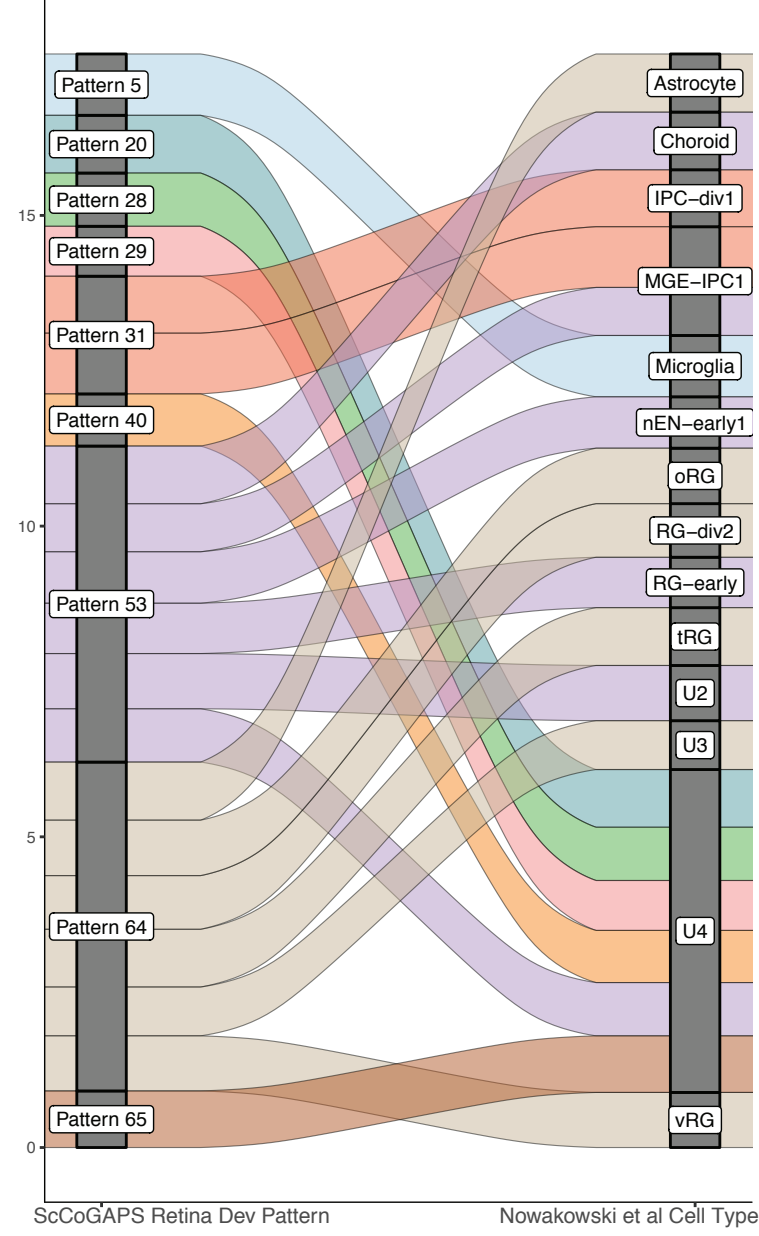

**B** Pattern explains at least 50% of cells in a given type

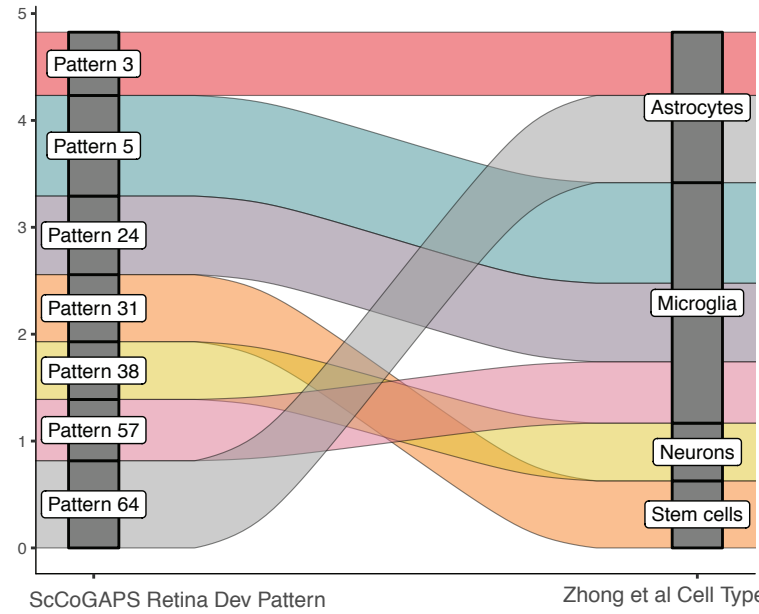

**C** Pattern explains at least 75% of cells in a given type

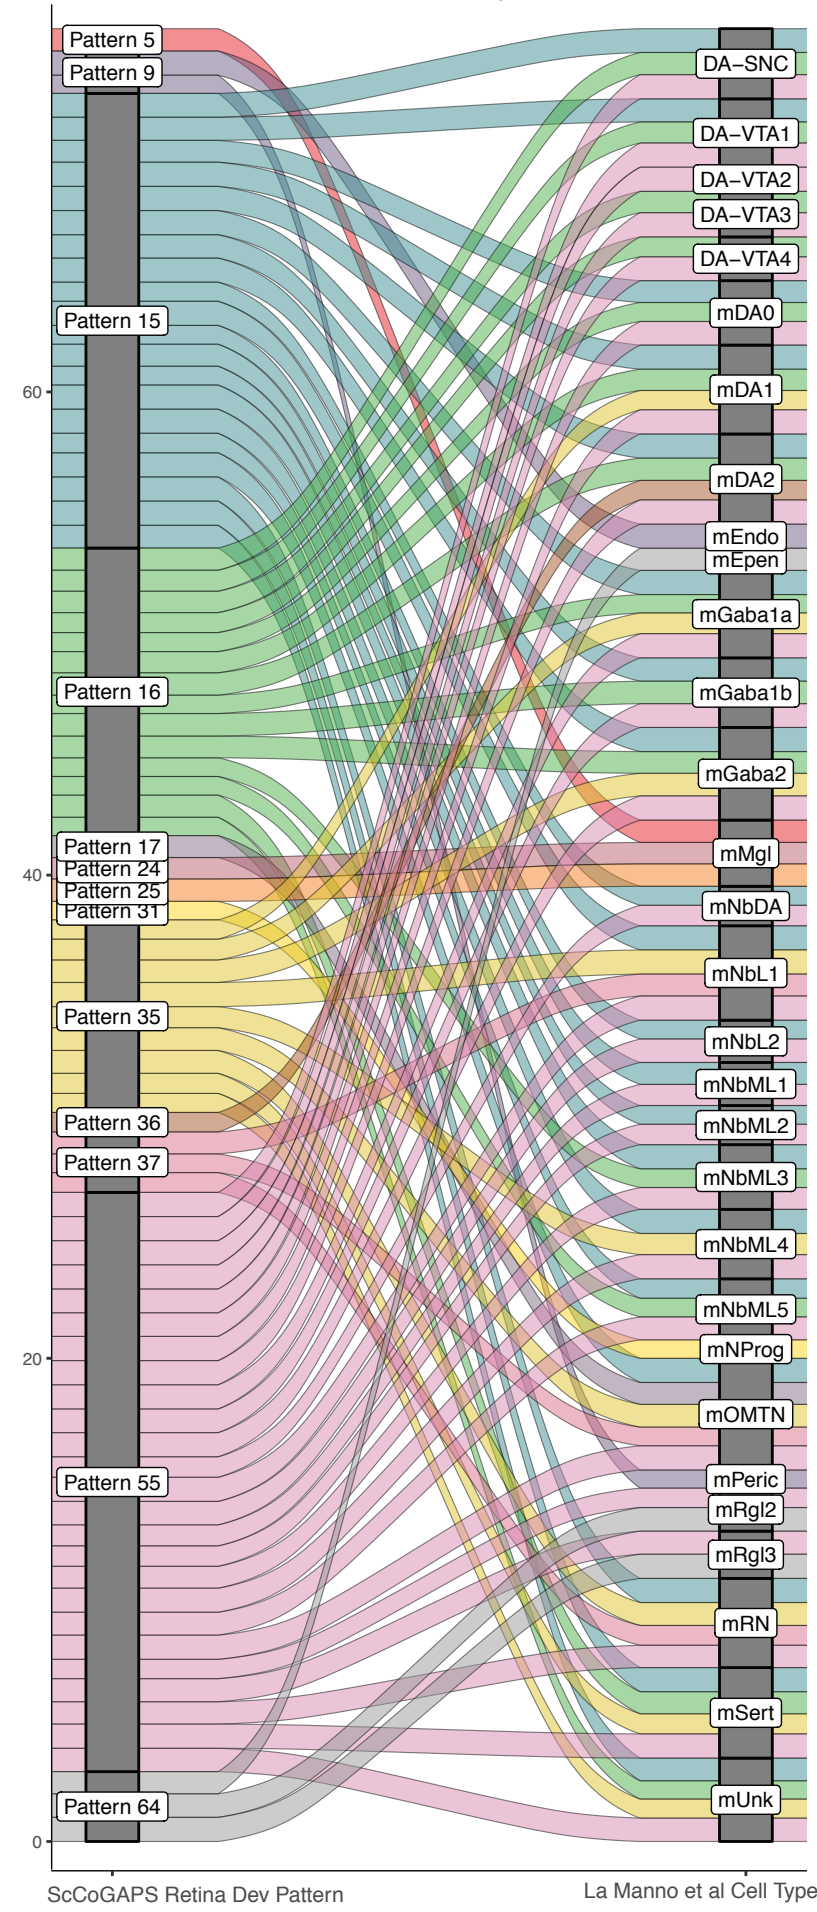

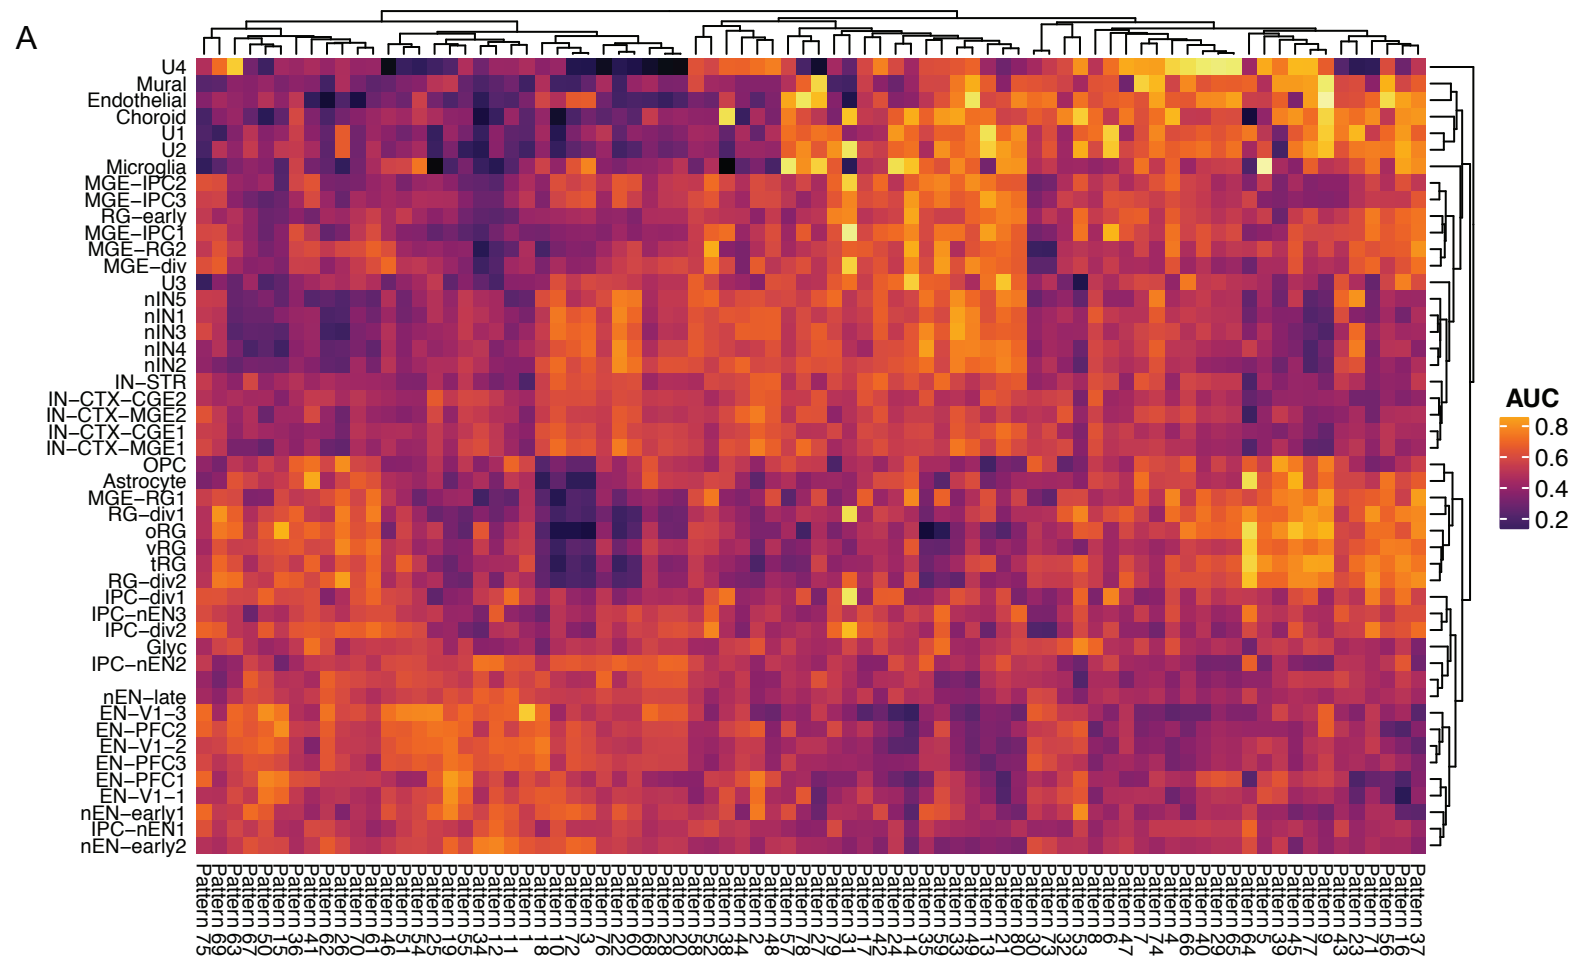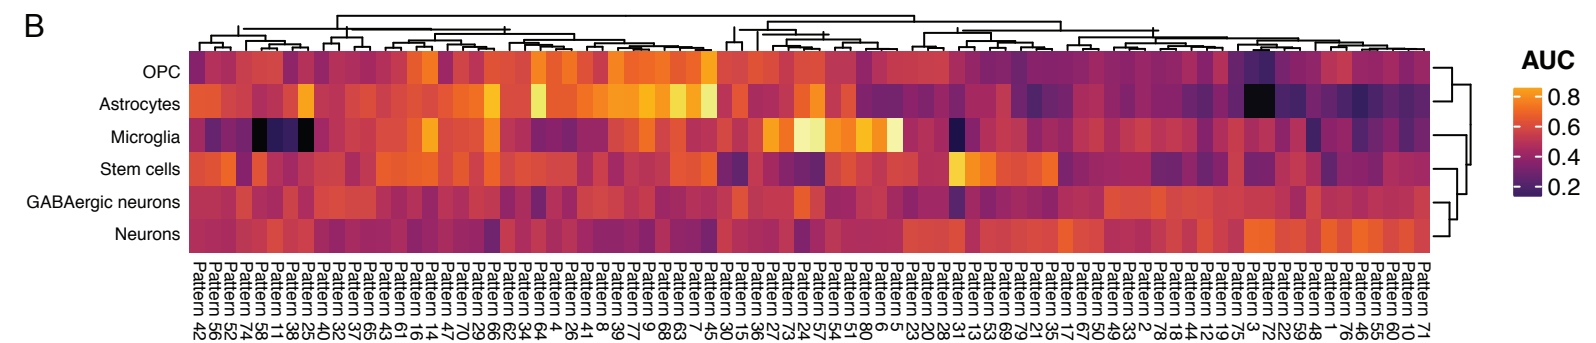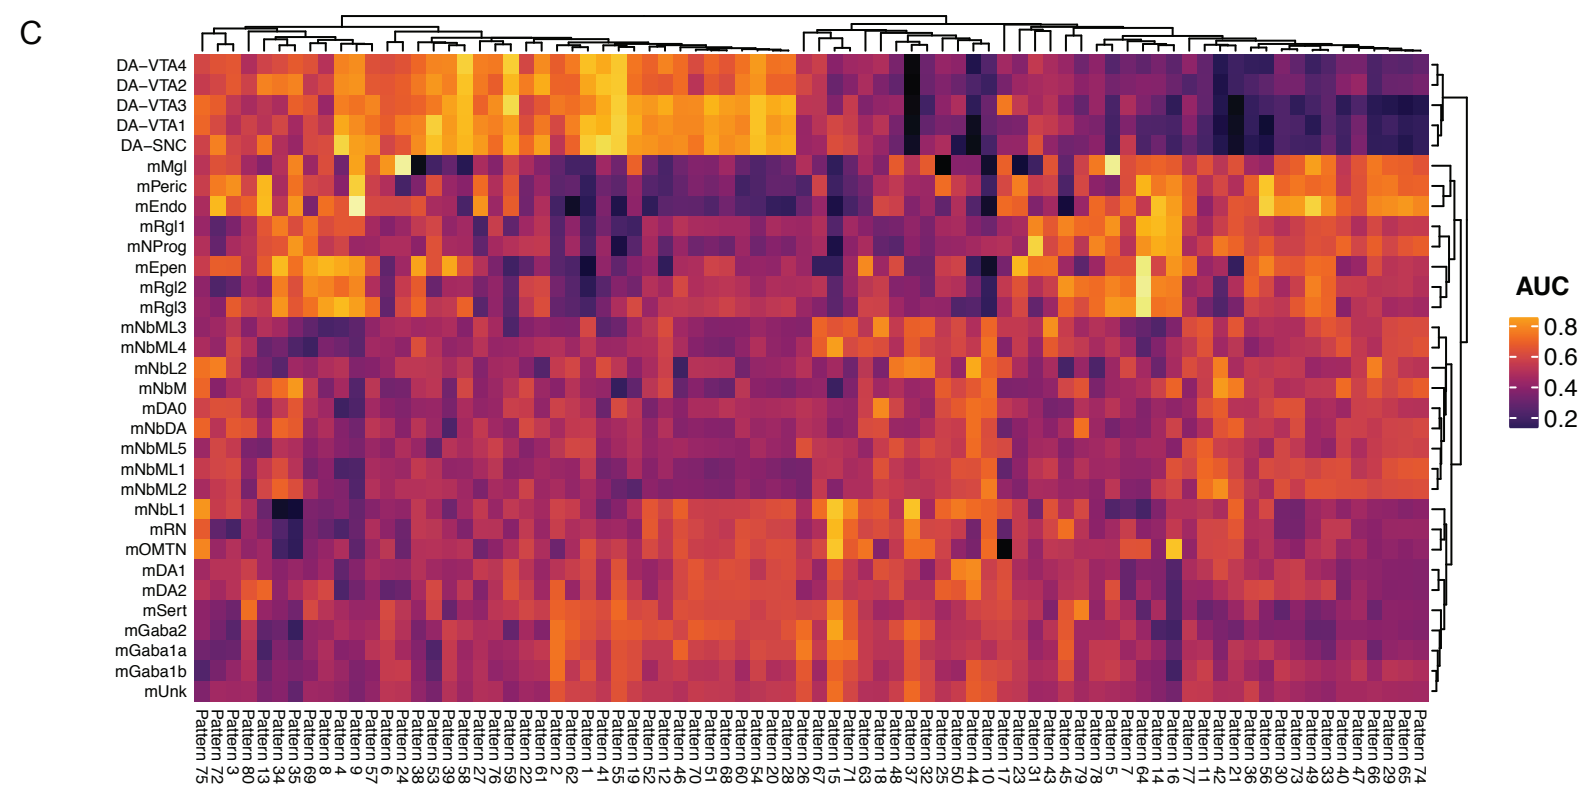



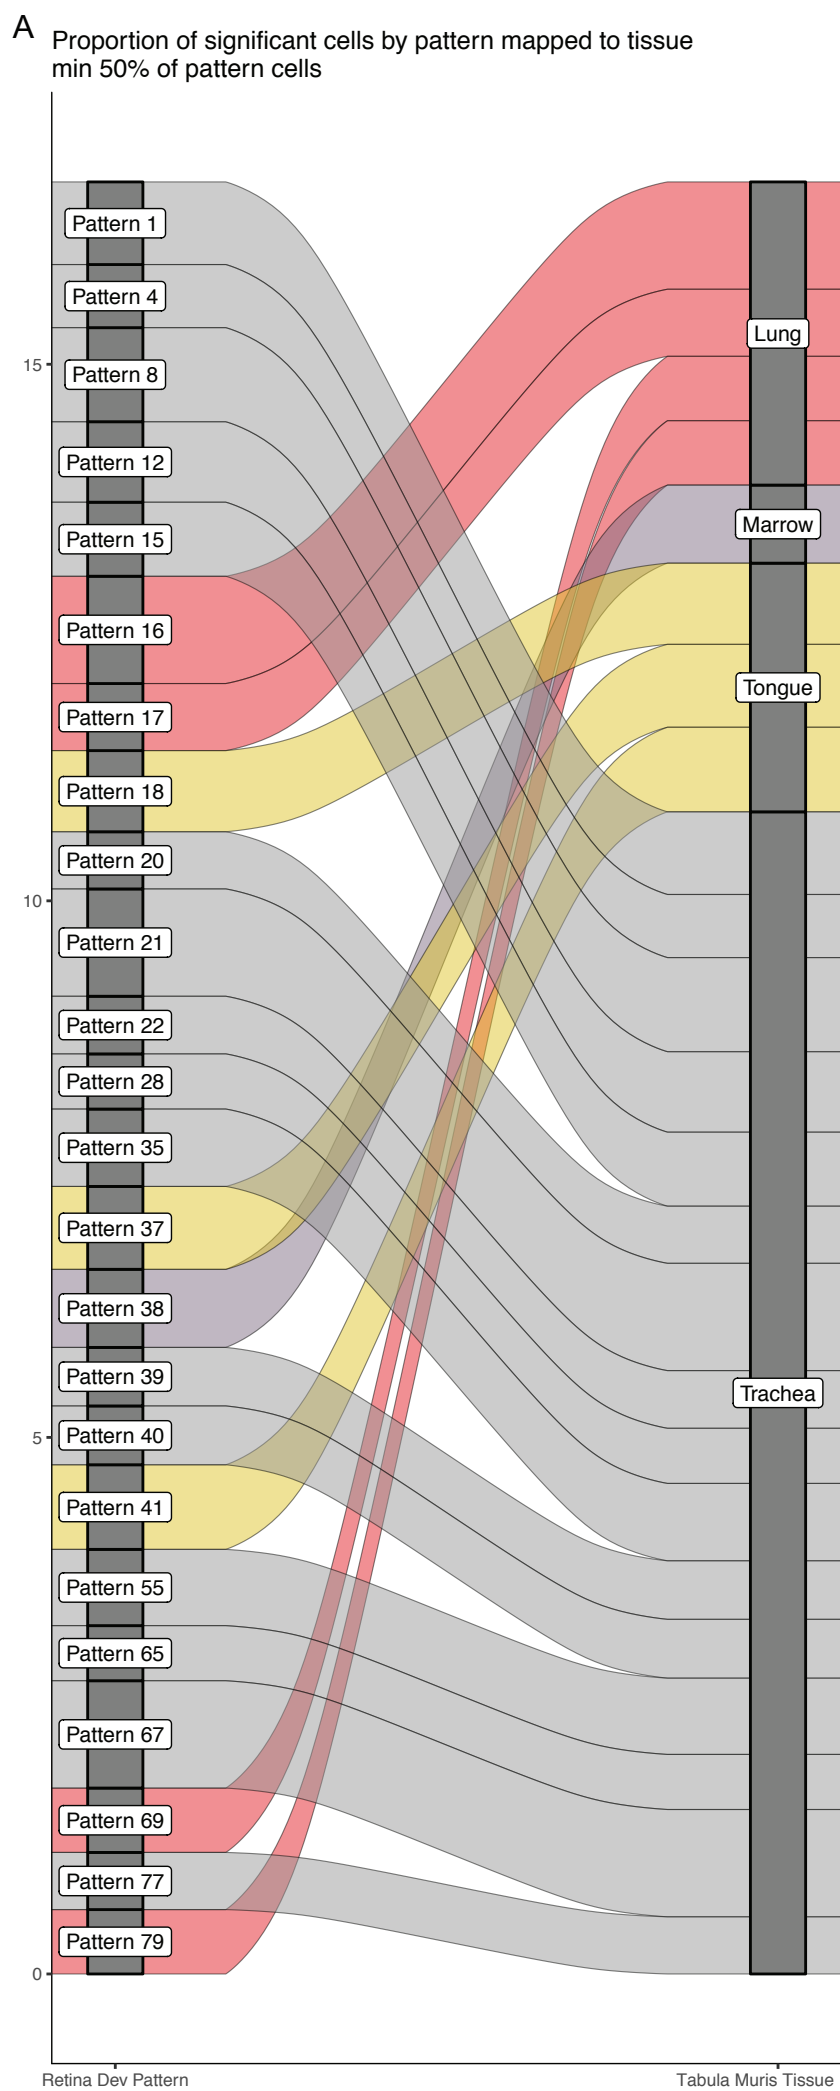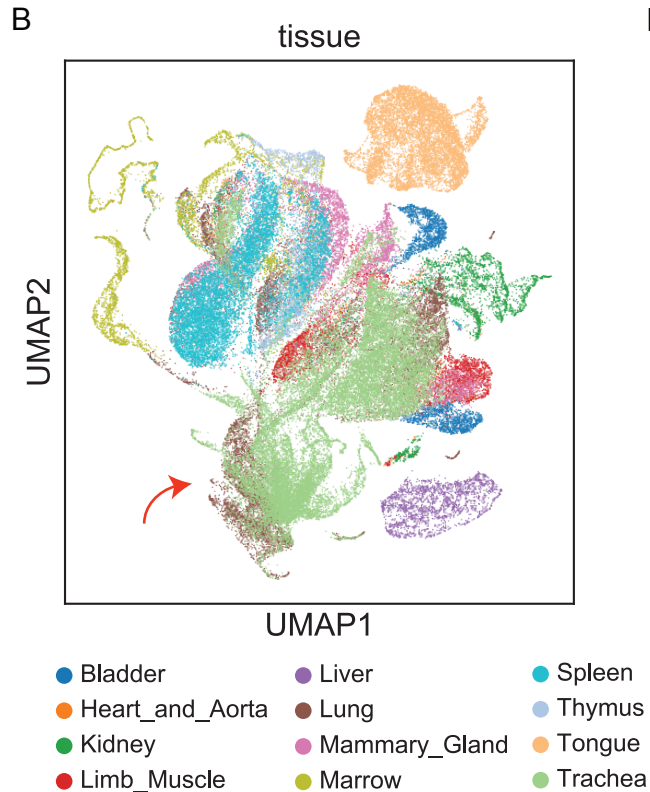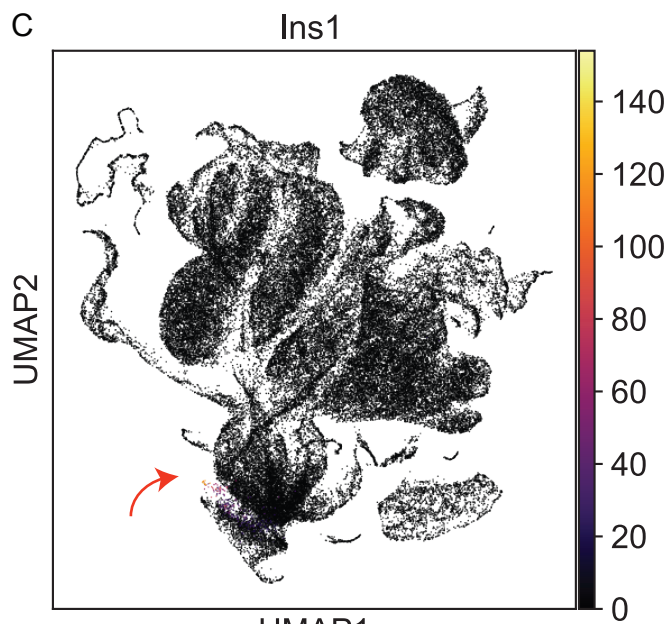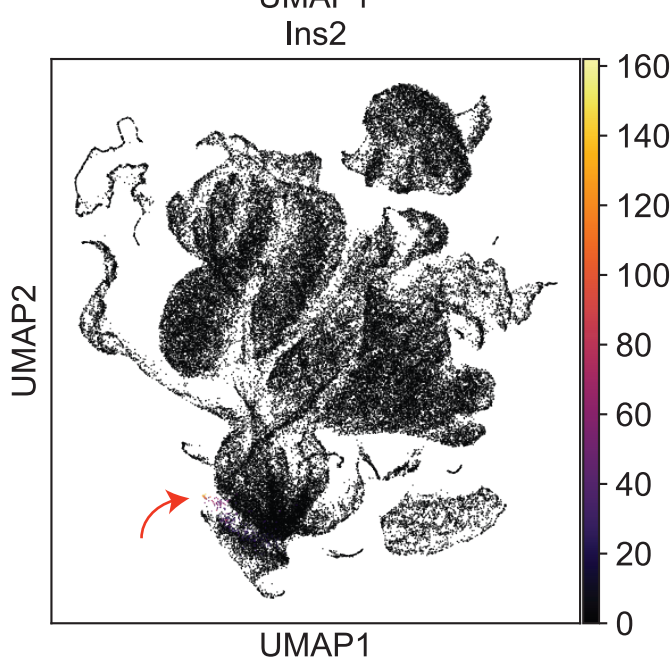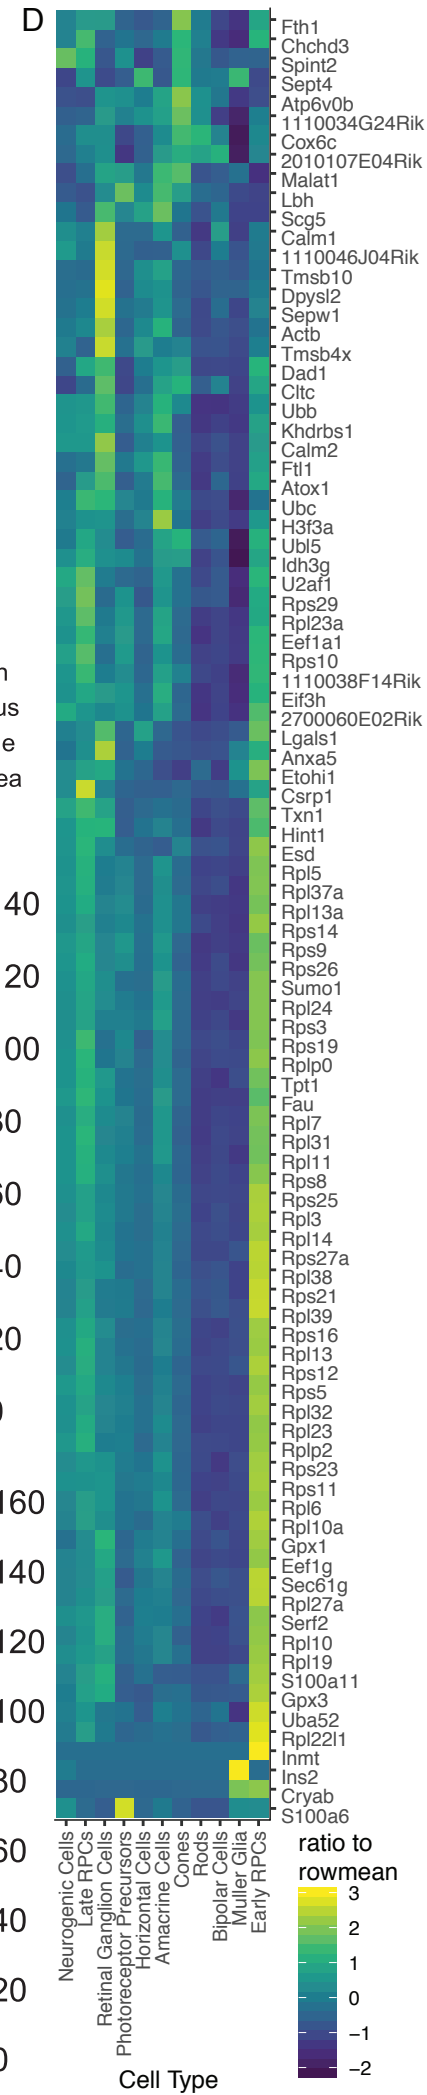

Supplement: Supplementary file [file 395004-1.pdf]
